# Supplementary material for: Genome-Wide Association of Bipolar Disorder Suggests an Enrichment of Replicable Associations in Regions near Genes
Source: PLOS journal article supplement (doi:10.1371/journal.pgen.1002134), 2011-06-30

## A. Bipolar disorder

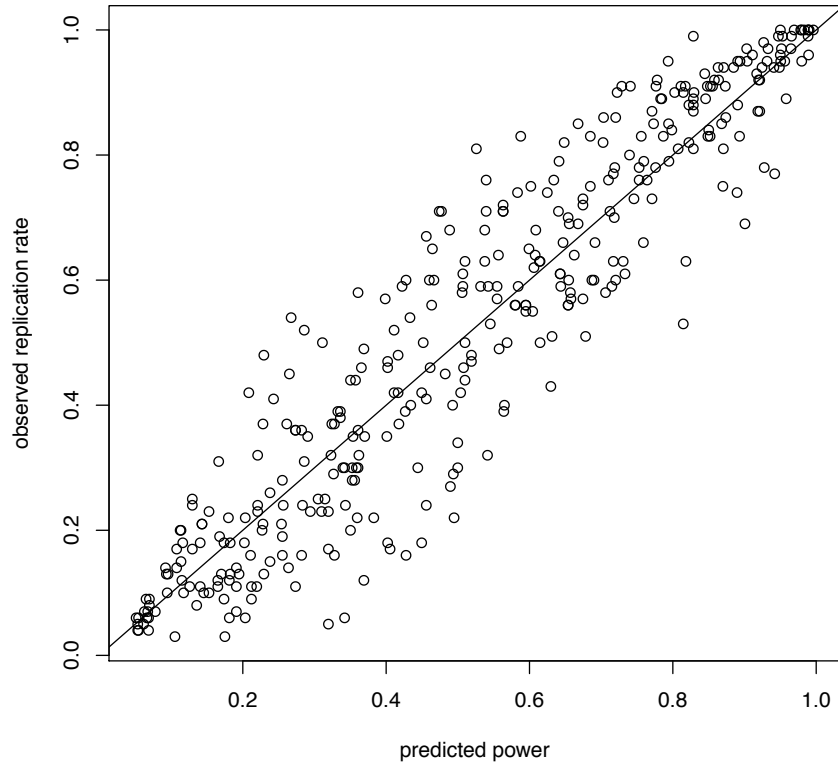

## B. Height

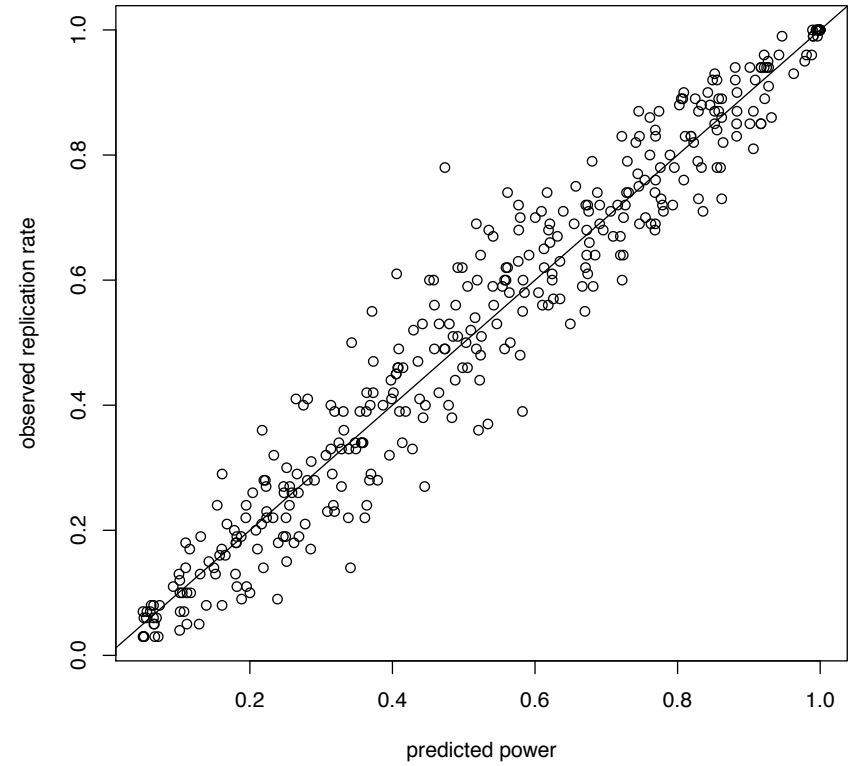

Supplement: S5 (10.1371/journal.pgen.1002134.s005) [file journal.pgen.1002134.s005]
